# Combining global tree cover loss data with historical national forest cover maps to look at six decades of deforestation and forest fragmentation in Madagascar

Ghislain Vieilledent<sup>1,2,\*</sup>, Clovis Grinand<sup>3</sup>, Fety A. Rakotomalala<sup>3</sup>,  
Rija Ranaivosoa<sup>4</sup>, Jean-Roger Rakotoarijaona<sup>4</sup>,  
Thomas F. Allnutt<sup>5,6</sup>, and Frédéric Achard<sup>1</sup>

[1] **Joint Research Center of the European Commission** – Bio-economy Unit, I-21027 Ispra (VA), ITALY

[2] **CIRAD** – UPR Forêts et Sociétés, F-34398 Montpellier, FRANCE

[3] **ETC Terra**, F-75020 Paris, FRANCE

[4] **Office National pour l'Environnement**, 101 Antananarivo, MADAGASCAR

[5] **Wildlife Conservation Society**, 101 Antananarivo, MADAGASCAR

[6] **GreenInfo Network**, Oakland, California, USA

[\*] **Corresponding author:** \E-mail: [ghislain.vieilledent@cirad.fr](mailto:ghislain.vieilledent@cirad.fr) \Phone: +39.033.278.3516

## Abstract

The island of Madagascar has a unique biodiversity, mainly located in the tropical forests of the island. This biodiversity is highly threatened by anthropogenic deforestation. Existing historical forest maps at national level are scattered and have substantial gaps which prevent an exhaustive assessment of long-term deforestation trends in Madagascar. In this study, we combined historical national forest cover maps (covering the period 1953-2000) with a recent global annual tree cover loss dataset (2001-2014) to look at six decades of deforestation and forest fragmentation in Madagascar (from 1953 to 2014). We produced new forest cover maps at 30 m resolution for the year 1990 and annually from 2000 to 2014 over the full territory of Madagascar. We estimated that Madagascar has lost 44% of its natural forest cover over the period 1953-2014 (including 37% over the period 1973-2014). Natural forests cover 8.9 Mha in 2014 (15% of the national territory) and include 4.4 Mha (50%) of moist forests, 2.6 Mha (29%) of dry forests, 1.7 Mha of spiny forests (19%) and 177,000 ha (2%) of mangroves. Since 2005, the annual deforestation rate has progressively increased in Madagascar to reach 99,000 ha/yr during 2010-2014 (corresponding to a rate of 1.1%/yr). Around half of the forest (46%) is now located at less than 100 m from the forest edge. Our approach could be replicated to other developing countries with tropical forest. Accurate forest cover change maps can be used to assess the effectiveness of past and current conservation programs and implement new strategies for the future. In particular, forest maps and estimates can be used in the REDD+ framework which aims at “Reducing Emissions from Deforestation and forest Degradation” and for optimizing the current protected area network.

*Keywords:* biodiversity, climate-change, deforestation, forest-fragmentation, Madagascar, tropical forest

## 27 1 Introduction

28 Separated from the African continent and the Indian plate about 165 and 88 million years  
29 ago respectively (Ali & Aitchison, 2008), the flora and fauna of Madagascar followed its  
30 own evolutionary path. Isolation combined with a high number of micro-habitats (Pearson  
31 & Raxworthy, 2009) has led to Madagascar's exceptional biodiversity both in term of num-  
32 ber of species and endemism in many taxonomic groups (Crottini *et al.*, 2012; Goodman  
33 & Benstead, 2005). Most of the biodiversity in Madagascar is concentrated in the tropical  
34 forests of the island which can be divided into four types: the moist forest in the East, the  
35 dry forest in the West, the spiny forest in the South and the mangroves on the West coast  
36 (Vieilledent *et al.*, 2016). This unparalleled biodiversity is severely threatened by defor-  
37 estation (Harper *et al.*, 2007; Vieilledent *et al.*, 2013) associated with human activities such  
38 as slash-and-burn agriculture and pasture (Scales, 2011). Tropical forests in Madagascar  
39 also store a large amount of carbon ( $136 \text{ MgC}\cdot\text{ha}^{-1}$  in the moist forest, Vieilledent *et al.*,  
40 2016) and high rates of deforestation in Madagascar (1.4–4.7 %/yr, Achard *et al.*, 2002)  
41 are responsible for large CO<sub>2</sub> emissions in the atmosphere. Deforestation threatens species  
42 survival by directly reducing their available habitat (Brooks *et al.*, 2002; Tidd *et al.*, 2001).  
43 Forest fragmentation can also lead to species extinction by isolating populations from each  
44 other and creating forest patches too small to maintain viable populations (Saunders *et al.*,  
45 1991). Fragmentation also increases forest edge where ecological conditions (such as air  
46 temperature, light intensity and air moisture) can be dramatically modified, with conse-  
47 quences on the abundance and distribution of species (Broadbent *et al.*, 2008; Gibson *et al.*,  
48 2013; Murcia, 1995). Forest fragmentation can also have substantial effects on forest car-  
49 bon storage capacity, as carbon stocks are about 50% lower at the forest edge than under  
50 a closed canopy (Brinck *et al.*, 2017). Moreover, forest carbon stocks vary spatially due  
51 to climate or soil factors (Saatchi *et al.*, 2011; Vieilledent *et al.*, 2016). As a consequence,

52 accurate and spatially explicit maps of forest cover and forest cover change are necessary  
53 to monitor biodiversity loss and carbon emissions from deforestation and forest fragmen-  
54 tation, assess the efficiency of present conservation strategies (Eklund *et al.*, 2016), and  
55 implement new strategies for the future (Vieilledent *et al.*, 2016, 2013). Simple time-series  
56 of forest cover estimates, such as those provided by the FAO Forest Resource Assessment  
57 report (Keenan *et al.*, 2015) are not sufficient.

58 Unfortunately, accurate and exhaustive forest cover maps are not available for Mada-  
59 gascar after year 2000. Harper *et al.* (2007) produced maps of forest cover and forest  
60 cover changes over Madagascar for the years 1953, 1973, 1990 and 2000. The 1953 forest  
61 map is a vector map derived from the visual interpretation of aerial photographs. Forest  
62 maps for the years 1973, 1990, and 2000 were obtained from the supervised classification  
63 of Landsat satellite images and can be used to derive more accurate estimates of forest  
64 cover than those from the FAO Forest Resource Assessment report. Nonetheless, maps  
65 provided by Harper *et al.* (2007) are not exhaustive (due to the presence of clouds in the  
66 satellite imagery), e.g. 11 244 km<sup>2</sup> are mapped as unknown cover type for the year 2000.  
67 Using a similar supervised classification approach as in Harper *et al.* (2007), more recent  
68 maps have been produced for the periods 2000-2005-2010 by national institutions, with the  
69 technical support of international environmental NGOs (MEFT *et al.*, 2009; ONE *et al.*,  
70 2013). Another set of recent forest cover maps using an advanced statistical tool for clas-  
71 sification, the Random Forest classifier (Grinand *et al.*, 2013; Rakotomala *et al.*, 2015),  
72 was produced for the periods 2005-2010-2013 (ONE *et al.*, 2015). However, these maps are  
73 either too old to give recent estimates of deforestation (MEFT *et al.*, 2009; ONE *et al.*,  
74 2013), include large areas of missing information due to images with high percentage of  
75 cloud cover (ONE *et al.*, 2013), or show large mis-classification in specific areas, especially  
76 in the dry and spiny forest domain, for which the spectral signal shows strong seasonal  
77 variations due to the deciduousness of such forests (overall accuracy is lower than 0.8 for

78 the dry and spiny forests for the maps produced by [ONE \*et al.\* \(2015\)](#)). Moreover, the  
79 production of such forest maps from a supervised classification approach requires signifi-  
80 cant resources, especially regarding the image selection step (required to minimize cloud  
81 cover) and the training step (visual interpretation of a large number of polygons needed to  
82 train the classification algorithm) ([Rakotomala \*et al.\*, 2015](#)). Most of this work of image  
83 selection and visual interpretation would need to be repeated to produce new forest maps  
84 in the future using a similar approach.

85 Global forest or tree cover products have also been published recently and can be  
86 tested at the national scale for Madagascar. [Kim \*et al.\* \(2014\)](#) produced a global forest  
87 cover change map from 1990 to 2000 (derived from Landsat imagery). This product was  
88 updated to cover the period 1975-2005 (<http://glcf.umd.edu/data/landsatFCC/>) but  
89 forest cover maps after 2005 were not produced. Moreover, the approach used in [Kim \*et al.\*](#)  
90 [\(2014\)](#) did not accurately map the forests in the dry and spiny ecosystems of Madagascar  
91 (see Fig. 8 in [Kim \*et al.\* 2014](#)). [Hansen \*et al.\* \(2013\)](#) mapped tree cover percentage, annual  
92 tree cover loss and gain from 2000 to 2012 at global scale at 30 m resolution. This product  
93 has since been updated and is now available up to the year 2014 ([Hansen \*et al.\*, 2013](#)).  
94 To map forest cover from the [Hansen \*et al.\* \(2013\)](#) product, a tree cover threshold must  
95 be selected (that defines forest cover). Selecting such a threshold is not straightforward  
96 as the accuracy of the global tree cover map strongly varies between forest types, and is  
97 substantially lower for dry forests than for moist forests ([Bastin \*et al.\*, 2017](#)). Moreover,  
98 the [Hansen \*et al.\* \(2013\)](#) product does not provide information on land-use. In particular  
99 the global tree cover map does not separate tree plantations such as oil palm or eucalyptus  
100 plantations from natural forests ([Tropek \*et al.\*, 2014](#)). Thus, the global tree cover map from  
101 [Hansen \*et al.\* \(2013\)](#) cannot be used alone to produce a map of forest cover ([Tyukavina](#)  
102 [et al., 2017](#)).

103 In this study, we present a simple approach which combines the historical forest maps

104 from Harper *et al.* (2007) and more recent global products from Hansen *et al.* (2013) to  
105 derive annual wall-to-wall forest cover change maps over the period 2000-2014 for Mada-  
106 gascar. We use the forest cover map provided by Harper *et al.* (2007) for the year 2000  
107 (defining the land-use) with the tree cover loss product provided by Hansen *et al.* (2013)  
108 that we apply only inside forest areas identified by Harper *et al.* (2007). Similar to the  
109 approach of Harper *et al.* (2007), we also assess trends in deforestation rates and forest  
110 fragmentation from 1953 to 2014. We finally discuss the possibility to extend our approach  
111 to other tropical countries or repeat it in the future for Madagascar. We also discuss how  
112 our results could help assess the effectiveness of past and current conservation strategies  
113 in Madagascar, and implement new strategies in the future.

## 114 2 Materials and Methods

### 115 2.1 Creation of new forest cover maps of Madagascar from 1953 116 to 2014

117 Original 1990-2000 forest cover change map for Madagascar from [Harper \*et al.\* \(2007\)](#) is a  
118 raster map at 28.5 m resolution. It was derived from the supervised classification of Landsat  
119 TM (Thematic Mapper) and ETM+ (Enhanced Thematic Mapper Plus) satellite images.  
120 For our study, this map has been resampled at 30 m resolution using a nearest-neighbor  
121 interpolation and reprojected in the WGS 84/UTM zone 38S projected coordinate system.

122 The 2000 Harper's forest map includes 208,000 ha of unclassified areas due to the  
123 presence of clouds on satellite images. Unclassified areas were mostly (88%) present within  
124 the moist forest domain which covered 4.17 Mha in 2000. To provide a label (forest  
125 or non-forest) to these unclassified pixels, we used the 2000 tree cover percentage map of  
126 [Hansen \*et al.\* \(2013\)](#) and selected a tree cover threshold of 75% to define the forest ([Achard  
127 \*et al.\*, 2014](#); [Aleman \*et al.\*, 2017](#)). This threshold allows to characterize properly the moist  
128 forest in Madagascar as 90% of the moist forest in 2000 in [Harper \*et al.\* \(2007\)](#) has a  
129 tree cover greater than 75% (Fig. [A1](#)). For this step, the Hansen's 2000 tree cover map  
130 was resampled on the same grid as the original Harper's map at 30 m resolution using a  
131 bilinear interpolation. We thus obtained a forest cover map for the year 2000 covering the  
132 full territory of Madagascar.

133 We then combined the forest cover map of the year 2000 with the annual tree cover loss  
134 maps from 2001 to 2014 from [Hansen \*et al.\* \(2013\)](#) to create annual forest cover maps from  
135 2001 to 2014 at 30 m resolution. To do so, Hansen's tree cover loss maps were resampled  
136 on the same grid as the original Harper's map at 30 m resolution using a nearest-neighbor  
137 interpolation. We also completed the Harper's forest map of year 1990 by filling unclassified  
138 areas (due to the presence of clouds on satellite images) using our forest cover map of year

139 2000. To do so, we assumed that if forest was present in 2000, the pixel was also forested in  
140 1990. Indeed, there is little evidence of natural forest regeneration in Madagascar (Grouzis  
141 *et al.*, 2001; Harper *et al.*, 2007), especially over such a short period of time. The remaining  
142 unclassified pixels were limited to a relatively small total area of about 8,000 ha. We labeled  
143 these residual pixels as non-forest, as for the year 2000.

144 The 1973 forest cover map for Madagascar from Harper *et al.* (2007) is a raster map at  
145 57 m resolution derived from the supervised classification of Landsat MSS (Multispectral  
146 Scanner System) satellite images. We resampled this map at 30 m resolution using a  
147 nearest-neighbor interpolation on the same grid as the forest cover maps for years 1990  
148 and 2000. We completed the Harper's forest map of year 1973 by filling unclassified areas  
149 using our forest cover map of the year 1990 assuming that if forest was present in 1990, it  
150 was also present in 1973. Contrary to the year 1990, the remaining unclassified pixels for  
151 year 1973 corresponded to a significant total area of 3.3 millions ha which was left as is.

152 The 1953 forest cover map from Harper *et al.* (2007) is a vector map produced by  
153 scanning the paper map of Humbert *et al.* (1965) which was derived from the visual inter-  
154 pretation of aerial photographs. We reprojected the forest cover map of year 1953 in the  
155 WGS 84/UTM zone 38S projected coordinate system. Because of the methodology used to  
156 derive the 1953 forest cover map, it was not possible to perfectly aligned this map with the  
157 forest cover maps of later years which were produced through digital processing of satellite  
158 imagery. As a consequence, the 1953 cannot be merged with the map of later years to  
159 identify precisely the location of the deforested areas. Nonetheless, the 1953 forest cover  
160 map can be used to have a rough estimate of the forest cover and forest fragmentation at  
161 this date. To do so, the map was rasterized at 30 m resolution on the same grid as the  
162 forest cover maps for years 1973, 1990 and 2000.

163 Finally for all forest cover maps from 1973, isolated single non-forest pixels (i.e. fully  
164 surrounded by forest pixels) were recategorized as forest pixels. Doing so, forest cover



165 increased from about 95,000 ha for year 1953 to about 600,000 ha for year 2010. This  
166 allowed us to avoid counting very small scale events (<0.1 ha, such as selective logging or  
167 wind-throw) as deforestation. It also prevents us from underestimating forest cover and  
168 overestimating forest fragmentation.

## 169 2.2 Computing forest cover areas and deforestation rates

170 From these new forest cover maps, we calculated the total forest cover area for seven  
171 available years (1953-1973-1990-2000-2005-2010-2014), and the annual deforested area and  
172 annual deforestation rate for the corresponding six time periods between 1953 and 2014.  
173 The annual deforestation rates were calculated using Eq. 1 (Puyravaud, 2003; Vieilledent  
174 *et al.*, 2013):

$$(1) \quad \theta = 100 \times [1 - (1 - (F_{t_2} - F_{t_1})/F_{t_1})^{1/(t_2-t_1)}]$$

175 In Eq. 1,  $\theta$  is the annual deforestation rate (in %/yr),  $F_{t_2}$  and  $F_{t_1}$  are the forest cover  
176 free of clouds at both dates  $t_2$  and  $t_1$ , and  $t_2 - t_1$  is the time-interval (in years) between  
177 the two dates.

178 Because of the large unclassified area (3.3 millions ha) in 1973, the annual deforestation  
179 areas and rates for the two periods 1953-1973 and 1973-1990 are only partial estimates  
180 computed on the basis of the available forest extent. Area and rate estimates are produced  
181 at the national scale and for the four forest types present in Madagascar: moist forest in  
182 the East, dry forest in the West, spiny forest in the South, and mangroves on the Western  
183 coast (Fig. 1). To define the forest types, we used a map from the MEFT (*Ministère de*  
184 *l'Environnement et des Forêts à Madagascar*) with the boundaries of the four ecoregions  
185 in Madagascar. Ecoregions were defined on the basis of climatic and vegetation criteria

186 using the climate classification by [Cornet \(1974\)](#) and the vegetation classification from  
187 the 1996 IEFN national forest inventory ([Ministère de l'Environnement, 1996](#)). Because  
188 mangrove forests are highly dynamic ecosystems that can expand or contract on decadal  
189 scales depending on changes in environmental factors ([Armitage \*et al.\*, 2015](#)), a fixed  
190 delimitation of the mangrove ecoregion on six decades might not be fully appropriate. As  
191 a consequence, our estimates of the forest cover and deforestation rates for mangroves in  
192 Madagascar must be considered with this limitation.

### 193 **2.3 Comparing our forest cover and deforestation rate estimates** 194 **with previous studies**

195 We compared our estimates of forest cover and deforestation rates with estimates from  
196 the three existing studies at the national scale for Madagascar: (i) [Harper \*et al.\* \(2007\)](#),  
197 (ii) [MEFT \*et al.\* \(2009\)](#) and (iii) [ONE \*et al.\* \(2015\)](#). [Harper \*et al.\* \(2007\)](#) provides forest  
198 cover and deforestation estimates for the periods c. 1953-c. 1973-1990-2000. [MEFT \*et al.\*](#)  
199 [\(2009\)](#) provides estimates for the periods 1990-2000-2005 and [ONE \*et al.\* \(2015\)](#) provides  
200 estimates for the periods 2005-2010-2013. To compare our forest cover and deforestation  
201 estimates over the same time periods, we consider an additional time-period in our study  
202 (2010-2013) by creating an extra forest cover map for the year 2013. We computed the  
203 Pearson's correlation coefficient and the root mean square error (RMSE) between our  
204 forest cover estimates and forest cover estimates from previous studies for all the dates  
205 and forest types (including also the total forest cover estimates). For previous studies,  
206 the computation of annual deforestation rates (in %/yr) is not always detailed and might  
207 slightly differ from one study to another (see [Puyravaud, 2003](#)). [Harper \*et al.\* \(2007\)](#) also  
208 provide total deforested areas for the two periods 1973-1990 and 1990-2000. We converted  
209 these values into annual deforested area estimates. When annual deforested areas were not

210 reported (for 1953-1973 in Harper *et al.* (2007) and in MEFT *et al.* (2009) and ONE *et al.*  
211 (2015)), we computed them from the forest cover estimates in each study. These estimates  
212 cannot be corrected from the potential bias due to the presence of residual clouds. Forest  
213 cover and deforestation rates were then compared between all studies for the whole of  
214 Madagascar and the four ecoregions. The same ecoregion boundaries as in our study were  
215 used in ONE *et al.* (2015) but this was not the case for Harper *et al.* (2007) and MEFT  
216 *et al.* (2009), which can explain a part of the differences between the estimates.

## 217 **2.4 Fragmentation**

218 We also conducted an analysis of changes in forest fragmentation for the years 1953, 1973,  
219 1990, 2000, 2005, 2010 and 2014 at 30 m resolution. We used a moving window of  $51 \times$   
220 51 pixels (corresponding to an area of about 2.34 km<sup>2</sup>) centered on each forest pixel to  
221 compute the percentage of forest pixels in the neighborhood. We used this percentage as an  
222 indication of the forest fragmentation (Riitters & Wickham, 2012; Vogt & Riitters, 2017).  
223 The size of the moving windows was based on a compromise: a sufficiently high number of  
224 cells (here 2601) had to be considered to be able to compute a percentage and a reasonably  
225 low number of cells had to be chosen to have a local estimate of the fragmentation. Water  
226 bodies were not masked when computing the percentage of forest pixels, meaning that  
227 forest located near a water body was considered as fragmented. Computations were done  
228 using the function `r.neighbors` of the GRASS GIS software (Neteler & Mitasova, 2008).  
229 Using the density of forest in the neighborhood, we defined five forest fragmentation classes:  
230 0-20% (highly fragmented), 21-40%, 41-60%, 61-80% and 81-100% (lowly fragmented). We  
231 reported the percentage of forest falling in each fragmentation class for the six years and  
232 analyzed the dynamics of fragmentation over the six decades.

233 We also computed the distance to forest edge for all forest pixels for the years 1953,  
234 1973, 1990, 2000, 2005, 2010 and 2014. For that, we used the function `gdal_proximity.py`

235 of the GDAL library (<http://www.gdal.org/>). We computed the mean and 90% quantiles  
236 (5% and 95%) of the distance to forest edge and looked at the variation of these values over  
237 time. Previous studies have shown that forest micro-habitats were mainly altered within  
238 the first 100 m of the forest edge (Brinck *et al.*, 2017; Broadbent *et al.*, 2008; Murcia,  
239 1995). Consequently, we also estimated the percentage of forest within the first 100 m of  
240 the forest edge for each year and looked at the variation of this percentage over the six  
241 decades.

## 242 **3 Results**

### 243 **3.1 Forest cover change and deforestation rates**

244 Natural forests in Madagascar covered 16.0 Mha in 1953, about 27% of the national ter-  
245 ritory of 587,041 km<sup>2</sup>. In 2014, the forest cover dropped to 8.9 Mha, corresponding to  
246 about 15% of the national territory (Fig. 2 and Tab. 1). Madagascar has lost 44% of its  
247 natural forest between 1953 and 2014, including 37% between 1973 and 2014 (Fig. 2 and  
248 Tab. 1). In 2014 the remaining 8.9 Mha of natural forest were distributed as follow: 4.4  
249 Mha of moist forest (50% of total forest cover), 2.6 Mha of dry forest (29%), 1.7 Mha of  
250 spiny forest (19%) and 0.18 Mha (2%) of mangrove forest (Fig. 1 and Tab. 2).

251 The forest cover change map produced on the period 1953-2014 (Fig. 2) allows to  
252 identify hot-spots of deforestation. Among the many recent hot-spots of deforestation  
253 visible on the map for the period 2000-2014, one is located at the south of the CAZ  
254 (“*Corridor Ankeniheny Zahamena*”) protected area, in the moist forest at the east of  
255 Madagascar (see eastern zoom in Fig. 2). Another major hot-spot of deforestation is  
256 located around the Ranobe-PK32 new protected area, in the dry forest at the south-west  
257 of Madagascar (see western zoom in Fig. 2).

258 Regarding the deforestation trend, we observed a progressive decrease of the deforesta-  
259 tion rate after 1990 from 205,000 ha/yr (1.6%/yr) over the period 1973-1990 to 42,000  
260 ha/yr (0.4%/yr) over the period 2000-2005 (Tab. 1). Then from 2005, the deforestation  
261 rate has progressively increased and has more than doubled over the period 2010-2014  
262 (99,000 ha/yr, 1.1%/yr) compared to 2000-2005 (Tab. 1). The deforestation trend, charac-  
263 terized by a progressive decrease of the deforestation rate over the period 1990-2005 and a  
264 progressive increase of the deforestation after 2005, is valid for all four forest types except  
265 the spiny forest (Tab. 3). For the spiny forest, the deforestation rate during the period  
266 2010-2013 was lower than on the period 2005-2010 (Tab. 3).

## 267 **3.2 Comparison with previous forest cover change studies in** 268 **Madagascar**

269 Forest cover maps provided by previous studies over Madagascar were not exhaustive  
270 (unclassified areas) due to the presence of clouds on satellite images used to produce such  
271 maps. In Harper *et al.* (2007), the maps of years 1990 and 2000 include 0.5 and 1.12 Mha  
272 of unknown cover type respectively. Proportions of unclassified areas are not reported  
273 in the two other existing studies at the national level by MEFT *et al.* (2009) and ONE  
274 *et al.* (2015). With our approach, we produced wall-to-wall forest cover change maps from  
275 1990 to 2014 for the full territory of Madagascar (Fig. 2). This allowed us to produce  
276 more robust estimates of forest cover and deforestation rates over this period (Tab. 1).  
277 Our forest cover estimates over the period 1953-2013 (considering forest cover estimates at  
278 national level and by ecoregions for all the available dates) were well correlated (Pearson's  
279 correlation coefficient = 0.99) to estimates from the three previous studies (Tab. 2) with a  
280 RMSE of 300,000 ha (6% of the mean forest cover of 4.8 Mha when considering all dates  
281 and forest types together). These small differences can be partly attributed to differences  
282 in ecoregion boundaries. Despite significant differences in deforestation estimates (Tab. 3),  
283 a similar deforestation trend was observed across studies with a decrease of deforestation  
284 rates over the period 1990-2005, followed by a progressive increase of the deforestation  
285 after 2005.

## 286 **3.3 Variation of forest fragmentation over time**

287 Forest fragmentation has progressively increased since 1953 in Madagascar. We observed a  
288 continuous decrease of the mean distance to forest edge from 1953 to 2014 in Madagascar.  
289 The mean distance to forest edge has decreased to about 300 m in 2014 while it was of  
290 about 1.5 km in 1973 (Fig. 3). Moreover, a large proportion (73%) of the forest was

291 located at a distance greater than 100 m in 1973, while almost half of the forest (46%) is  
292 at a distance lower than 100 m from forest edge in 2014 (Fig. 3). The percentage of lowly  
293 fragmented forest in Madagascar has continuously decreased since 1953. The percentage  
294 of forest belonging to the lowly fragmented class has fallen from 57% in 1973 to 44% in  
295 2014. In 2014, 22% of the forest belonged to the two highest fragmented forest classes (less  
296 than 40% of forest cover in the neighborhood) while only 15% of the forest belonged to  
297 these two fragmentation classes in 1973 (Tab. 4).

## 298 4 Discussion

### 299 4.1 Advantages of combining recent global annual tree cover loss 300 data with historical national forest cover maps

301 In this study, we combined recent (2001-2014) global annual tree cover loss data (Hansen  
302 *et al.*, 2013) with historical (1953-2000) national forest cover maps (Harper *et al.*, 2007) to  
303 look at six decades (1953-2014) of deforestation and forest fragmentation in Madagascar.  
304 We produced annual forest cover maps at 30 m resolution covering Madagascar for the  
305 period 2000 to 2014. Our study extends the forest cover monitoring on a six decades period  
306 (from 1953 to 2014) while harmonizing the data from previous studies (Harper *et al.*, 2007;  
307 MEFT *et al.*, 2009; ONE *et al.*, 2015). We propose a generic approach to solve the problem  
308 of forest definition which is needed to transform the 2000 global tree cover dataset from  
309 Hansen *et al.* (2013) into a forest/non-forest map (Tropek *et al.*, 2014). We propose the  
310 use of an historical national forest cover map, based on a national forest definition, as a  
311 forest cover mask. This approach could be easily extended to other tropical regions or  
312 countries for which an accurate forest cover map is available at any date within the period  
313 2000-2014 (but preferably at the beginning of the period to profit from the full record of  
314 tree cover loss and derive long-term estimates of deforestation). For example, forest cover  
315 maps are available at 20 m resolution for Cameroon and Central African Republic for  
316 years 2000 and 2010 (Gross *et al.*, 2017). When high resolution forest cover maps are not  
317 available, coarser resolution forest cover maps (leading to coarser deforestation estimates)  
318 could be extracted from global land cover products such as GLC2000 at 1 km resolution  
319 (Bartholomé & Belward, 2005) or CCI Land Cover at 300 m resolution (Li *et al.*, 2018).  
320 Moreover, this approach could be repeated in the future with the release of updated tree  
321 cover loss data. We have made the **R**/GRASS code used for this study freely available in a  
322 GitHub repository (see Data availability statement) to facilitate application to other study



323 areas or repeat the analysis in the future for Madagascar.

324 The accuracy of the derived forest cover change maps depends directly on the ac-  
325 curacy of the historical forest cover maps and the tree cover loss dataset. Using visual-  
326 interpretation of aerial images in 342 areas distributed among all forest types, Harper *et al.*  
327 (2007) estimated an overall 89.5% accuracy in identifying forest/non-forest classes for the  
328 year 2000. The accuracy assessment of the tree cover loss dataset for the tropical biome  
329 reported 13% of false positives and 16.9% of false negatives (see Tab. S5 in Hansen *et al.*  
330 2013). These numbers rise at 20.7% and 20.6% respectively for the subtropical biome.  
331 In the subtropical biome, the lower density tree cover canopy makes it difficult to detect  
332 change from tree cover to bare ground. For six countries in Central Africa, with a major-  
333 ity of moist dense forest, Verhegghen *et al.* (2016) have compared deforestation estimates  
334 derived from the global tree cover loss dataset (Hansen *et al.*, 2013) with results derived  
335 from semi-automated supervised classification of Landsat satellite images (Achard *et al.*,  
336 2014) and they found a good agreement between the two sets of estimates. Therefore, our  
337 forest cover change maps after 2000 might be more accurate for the dense moist forest than  
338 for the dry and spiny forest. In another study assessing the accuracy of the tree cover loss  
339 product across the tropics (Tyukavina *et al.*, 2015), authors reported 4% of false positives  
340 and 48% of false negatives in Sub-Saharan Africa. They showed that 85% of missing loss  
341 occurred on the edges of other loss patches. This means that tree cover loss might be  
342 underestimated in Sub-Saharan Africa, probably due to the prevalence of small-scale dis-  
343 turbance which is hard to map at 30 m, but that areas of large-scale deforestation are well  
344 identified and spatial variability of the deforestation is well represented. A proper accuracy  
345 assessment of our forest cover change maps should be performed to better estimate the  
346 uncertainty surrounding our forest cover change estimates in Madagascar from year 2000  
347 (Olofsson *et al.*, 2014, 2013). Despite this limitation, we have shown that the deforestation  
348 trend we observed for Madagascar, with a doubling deforestation on the period 2010-2014

349 compared to 2000-2005, was consistent with the other studies at the national scale (MEFT  
350 *et al.*, 2009; ONE *et al.*, 2015).

351 Consistent with Harper *et al.* (2007), we did not consider potential forest regrowth in  
352 Madagascar (although Hansen *et al.* (2013) provided a tree cover gains layer for the period  
353 2001-2013) for several reasons. First, the tree gain layer of Hansen *et al.* (2013) includes  
354 and catches more easily tree plantations than natural forest regrowth (Tropek *et al.*, 2014).  
355 Second, there is little evidence of natural forest regeneration in Madagascar (Grouzis *et al.*,  
356 2001; Harper *et al.*, 2007). This can be explained by several ecological processes following  
357 burning practice such as soil erosion (Grinand *et al.*, 2017) and reduced seed bank due to  
358 fire and soil loss (Grouzis *et al.*, 2001). Moreover, in areas where forest regeneration is  
359 ecologically possible, young forest regrowth are more easily re-burnt for agriculture and  
360 pasture. Third, young secondary forests provide more limited ecosystem services compared  
361 to old-growth natural forests in terms of biodiversity and carbon storage (Martin *et al.*,  
362 2013).

## 363 4.2 Natural forest cover change in Madagascar from 1953 to 2014

364 We estimated that natural forest in Madagascar covers 8.9 Mha in 2014 (corresponding to  
365 15% of the country) and that Madagascar has lost 44% of its natural forest since 1953 (37%  
366 since 1973). If there are no doubts about the direct causes of deforestation in Madagascar,  
367 attributable to human activities such as slash-and-burn agriculture and pasture (Scales,  
368 2011), there is ongoing scientific debate about the extent of the “original” forest cover in  
369 Madagascar, and the extent to which humans have altered the natural forest landscapes  
370 since their large-scale settlement around 800 CE (Burns *et al.*, 2016; Cox *et al.*, 2012). Early  
371 French naturalists stated that the full island was originally covered by forest (Humbert,  
372 1927; Perrier de La Bâthie, 1921), leading to the common statement that 90% of the nat-  
373 ural forests have disappeared since the arrival of humans on the island (Kull, 2000). More

374 recent studies counter-balanced that point of view saying that extensive areas of grassland  
375 existed in Madagascar long before human arrival and were determined by climate, natural  
376 grazing and other natural factors (Virah-Sawmy, 2009; Vorontsova *et al.*, 2016). Other  
377 authors have questioned the entire narrative of extensive alteration of the landscape by  
378 early human activity which, through legislation, has severe consequences on local people  
379 (Klein, 2002; Kull, 2000). Whatever the original proportion of natural forests and grass-  
380 lands in Madagascar, our results demonstrate that human activities since the 1950s have  
381 profoundly impacted the natural tropical forests and that conservation and development  
382 programs in Madagascar have failed to stop deforestation in the recent years. Deforestation  
383 has strong consequences on biodiversity and carbon emissions in Madagascar. Around 90%  
384 of Madagascar's species are forest dependent (Allnutt *et al.*, 2008; Goodman & Benstead,  
385 2005). Based on occurrence data for 2243 plant and invertebrate species, Allnutt *et al.*  
386 (2008) estimated that deforestation between 1953 and 2000 has led to an extinction of 9%  
387 of the species. The additional deforestation we observed over the period 2000-2014 (around  
388 1 Mha of natural forest) worsen this result. Regarding carbon emissions, using the 2010  
389 aboveground forest carbon map by Vieilledent *et al.* (2016), we estimated that deforesta-  
390 tion on the period 2010-2014 has led to 40.2 Mt C of carbon emissions in the atmosphere  
391 (10 Mt C /yr) and that the remaining aboveground forest carbon stock in 2014 is 832.8  
392 Mt C. Associated to deforestation, we showed that the remaining forests of Madagascar  
393 are highly fragmented with 46% of the forest being at less than 100 m of the forest edge.  
394 Small forest fragments do not allow to maintain viable populations and "edge effects" at  
395 forest/non-forest interfaces have impacts on both carbon emissions (Brinck *et al.*, 2017)  
396 and biodiversity loss (Gibson *et al.*, 2013; Murcia, 1995).

### 397 **4.3 Deforestation trend and impacts on conservation and devel-** 398 **opment policies**

399 In our study, we have shown that the progressive decrease of the deforestation rate on the  
400 period 1990-2005 was followed by a continuous increase in the deforestation rate on the  
401 period 2005-2014. In particular, we showed that deforestation rate has more than doubled  
402 on the period 2010-2014 compared to 2000-2005. Our results are supported by previous  
403 studies ([Harper \*et al.\*, 2007](#); [MEFT \*et al.\*, 2009](#); [ONE \*et al.\*, 2015](#)) despite differences in  
404 the methodologies regarding (i) forest definition (associated to independent visual inter-  
405 pretations of observation polygons to train the classifier), (ii) classification algorithms, (iii)  
406 deforestation rate computation method, and (iv) correction for the presence of clouds.  
407 Our deforestation rate estimates from 1990 to 2014 have been computed from wall-to-wall  
408 maps at 30 m resolution and can be considered more accurate in comparison with estimates  
409 from these previous studies. Our natural forest cover and deforestation rate estimates can  
410 be used as source of information for the next FAO Forest Resources Assessment ([Keenan  
411 \*et al.\*, 2015](#)). Current rates of deforestation can also be used to build reference scenar-  
412 ios for deforestation in Madagascar and contribute to the implementation of deforestation  
413 mitigation activities in the framework of REDD+ ([Olander \*et al.\*, 2008](#)).

414 The increase of deforestation rates after 2005 can be explained by population growth  
415 and political instability in the country. Nearly 90% of Madagascar's population relies on  
416 biomass for their daily energy needs ([Minten \*et al.\*, 2013](#)) and the link between population  
417 size and deforestation has previously been demonstrated in Madagascar ([Gorenflo \*et al.\*,  
418 2011](#); [Vieilledent \*et al.\*, 2013](#)). With a mean demographic growth rate of about 2.8%/yr  
419 and a population which has increased from 16 to 24 million people on the period 2000-2015  
420 ([United Nations, 2015](#)), the increasing demand in wood-fuel and space for agriculture is  
421 likely to explain the increase in deforestation rates. The political crisis of 2009 ([Ploch &](#)

422 Cook, 2012), followed by several years of political instability and weak governance could  
423 also explain the increase in the deforestation rate observed on the period 2005-2014 (see  
424 Smith *et al.*, 2003 for a discussion on the link between governance and forest cover loss).  
425 These results show that despite the conservation policy in Madagascar (Freudenberger,  
426 2010), deforestation has dramatically increased at the national level since 2005. Results  
427 of this study, including recent spatially explicit forest cover change maps and forest cover  
428 estimates, should help implement new conservation strategies to save Madagascar natural  
429 tropical forests and their unique biodiversity.

## 430 **5 Author's contribution**

431 All authors conceived the ideas and designed the methodology; GV analysed the data and  
432 wrote the **R**/GRASS script; GV drafted the manuscript. All authors contributed critically  
433 to the drafts and gave final approval for publication.

## 434 **6 Acknowledgements**

435 The authors thank two anonymous reviewers for useful comments on a previous version  
436 of the manuscript. They also thank Peter Vogt for useful advice on which metric to  
437 use to estimate forest fragmentation. This study is part of the CIRAD's BioSceneMada  
438 project (<https://bioscenemada.cirad.fr>) and the Joint Research Center's ReCaREDD  
439 project (<http://forobs.jrc.ec.europa.eu/recaredd>). The BioSceneMada project is  
440 funded by FRB (Fondation pour la Recherche sur la Biodiversité) and the FFEM (Fond  
441 Français pour l'Environnement Mondial) under the project agreement AAP-SCEN-2013 I.  
442 The ReCaREDD project is funded by the European Commission. The authors declare  
443 that there are no conflicts of interest related to this article.

## 444 **7 Data accessibility**

445 Data and code used for this study have been made permanently and publicly available on  
446 the CIRAD Dataverse repository so that the results are entirely reproducible:

- 447 • Input data: <http://dx.doi.org/10.18167/DVN1/2FP7LR>
- 448 • Code: <http://dx.doi.org/10.18167/DVN1/275TDF>
- 449 • Output data: <http://dx.doi.org/10.18167/DVN1/AUBRRC>

## 450 8 References

- 451 Achard, F., Beuchle, R., Mayaux, P., Stibig, H.J., Bodart, C., Brink, A., Carboni, S.,  
452 Desclée, B., Donnay, F., Eva, H.D., Lupi, A., Raši, R., Seliger, R. & Simonetti, D.  
453 (2014) Determination of tropical deforestation rates and related carbon losses from 1990  
454 to 2010. *Global Change Biology* **20**, 2540–2554.
- 455 Achard, F., Eva, H.D., Stibig, H.J., Mayaux, P., Gallego, J., Richards, T. & Malingreau,  
456 J.P. (2002) Determination of deforestation rates of the world’s humid tropical forests.  
457 *Science* **297**, 999–1002.
- 458 Aleman, J.C., Jarzyna, M.A. & Staver, A.C. (2017) Forest extent and deforestation in  
459 tropical africa since 1900. *Nature Ecology & Evolution* .
- 460 Ali, J.R. & Aitchison, J.C. (2008) Gondwana to Asia: Plate tectonics, paleogeography and  
461 the biological connectivity of the Indian sub-continent from the Middle Jurassic through  
462 latest Eocene (166–35 Ma). *Earth-Science Reviews* **88**, 145–166.
- 463 Allnutt, T.F., Ferrier, S., Manion, G., Powell, G.V.N., Ricketts, T.H., Fisher, B.L., Harper,  
464 G.J., Irwin, M.E., Kremen, C., Labat, J.N., Lees, D.C., Pearce, T.A. & Rakotondrainibe,  
465 F. (2008) A method for quantifying biodiversity loss and its application to a 50-year  
466 record of deforestation across Madagascar. *Conservation Letters* **1**, 173–181.
- 467 Armitage, A.R., Highfield, W.E., Brody, S.D. & Louchouart, P. (2015) The contribution of  
468 mangrove expansion to salt marsh loss on the Texas Gulf Coast. *PloS One* **10**, e0125404.
- 469 Bartholomé, E. & Belward, A.S. (2005) GLC2000: a new approach to global land cover  
470 mapping from earth observation data. *International Journal of Remote Sensing* **26**,  
471 1959–1977.
- 472 Bastin, J.F., Berrahmouni, N., Grainger, A., Maniatis, D., Mollicone, D., Moore, R.,  
473 Patriarca, C., Picard, N., Sparrow, B., Abraham, E.M., Aloui, K., Atesoglu, A., Attore,  
474 F., Bassüllü, Ç., Bey, A., Garzuglia, M., García-Montero, L.G., Groot, N., Guerin, G.,  
475 Laestadius, L., Lowe, A.J., Mamane, B., Marchi, G., Patterson, P., Rezende, M., Ricci,  
476 S., Salcedo, I., Diaz, A.S.P., Stolle, F., Surappaeva, V. & Castro, R. (2017) The extent  
477 of forest in dryland biomes. *Science* **356**, 635–638.
- 478 Brinck, K., Fischer, R., Groeneveld, J., Lehmann, S., Dantas De Paula, M., Pütz, S.,  
479 Sexton, J.O., Song, D. & Huth, A. (2017) High resolution analysis of tropical forest  
480 fragmentation and its impact on the global carbon cycle. *Nature Communications* **8**,  
481 14855.
- 482 Broadbent, E.N., Asner, G.P., Keller, M., Knapp, D.E., Oliveira, P.J. & Silva, J.N. (2008)  
483 Forest fragmentation and edge effects from deforestation and selective logging in the  
484 brazilian amazon. *Biological Conservation* **141**, 1745 – 1757.

- 485 Brooks, T.M., Mittermeier, R.A., Mittermeier, C.G., da Fonseca, G.A.B., Rylands, A.B.,  
486 Konstant, W.R., Flick, P., Pilgrim, J., Oldfield, S., Magin, G. & Hilton-Taylor, C.  
487 (2002) Habitat loss and extinction in the hotspots of biodiversity. *Conservation Biology*  
488 **16**, 909–923.
- 489 Burns, S.J., Godfrey, L.R., Faina, P., McGee, D., Hardt, B., Ranivoharimanana, L. &  
490 Randrianasy, J. (2016) Rapid human-induced landscape transformation in Madagascar  
491 at the end of the first millennium of the Common Era. *Quaternary Science Reviews* **134**,  
492 92 – 99.
- 493 Cornet, A. (1974) Essai de cartographie bioclimatique à Madagascar. Tech. rep., Orstom.
- 494 Cox, M.P., Nelson, M.G., Tumonggor, M.K., Ricaut, F.X. & Sudoyo, H. (2012) A small  
495 cohort of Island Southeast Asian women founded Madagascar. *Proceedings of the Royal*  
496 *Society B: Biological Sciences* **279**, 2761–2768.
- 497 Crottini, A., Madsen, O., Poux, C., Strauß, A., Vieites, D.R. & Vences, M. (2012) Verte-  
498 brate time-tree elucidates the biogeographic pattern of a major biotic change around the  
499 K–T boundary in Madagascar. *Proceedings of the National Academy of Sciences* **109**,  
500 5358–5363.
- 501 Eklund, J., Blanchet, F.G., Nyman, J., Rocha, R., Virtanen, T. & Cabeza, M. (2016)  
502 Contrasting spatial and temporal trends of protected area effectiveness in mitigating  
503 deforestation in Madagascar. *Biological Conservation* **203**, 290 – 297.
- 504 Freudenberger, K. (2010) Paradise Lost? Lessons from 25 years of USAID environment  
505 programs in Madagascar. *International Resources Group, Washington DC* .
- 506 Gibson, L., Lynam, A.J., Bradshaw, C.J., He, F., Bickford, D.P., Woodruff, D.S., Bum-  
507 rungsri, S. & Laurance, W.F. (2013) Near-complete extinction of native small mammal  
508 fauna 25 years after forest fragmentation. *Science* **341**, 1508–1510.
- 509 Goodman, S.M. & Benstead, J.P. (2005) Updated estimates of biotic diversity and en-  
510 demism for Madagascar. *Oryx* **39**, 73–77.
- 511 Gorenflo, L.J., Corson, C., Chomitz, K.M., Harper, G., Honzák, M. & Özler, B. (2011)  
512 *Exploring the Association Between People and Deforestation in Madagascar*, vol. 1650.  
513 Springer Berlin Heidelberg.
- 514 Grinand, C., Le Maire, G., Vieilledent, G., Razakamanarivo, H., Razafimbelo, T. &  
515 Bernoux, M. (2017) Estimating temporal changes in soil carbon stocks at ecoregional  
516 scale in Madagascar using remote-sensing. *International Journal of Applied Earth Ob-*  
517 *servation and Geoinformation* **54**, 1–14.
- 518 Grinand, C., Rakotomalala, F., Gond, V., Vaudry, R., Bernoux, M. & Vieilledent, G.  
519 (2013) Estimating deforestation in tropical humid and dry forests in Madagascar from



- 520 2000 to 2010 using multi-date Landsat satellite images and the Random Forests classifier.  
521 *Remote Sensing of Environment* **139**, 68–80.
- 522 Gross, D., Achard, F., Dubois, G., Brink, A. & Prins, H.H.T. (2017) Uncertainties in tree  
523 cover maps of sub-saharan africa and their implications for measuring progress towards  
524 cbd aichi targets. *Remote Sensing in Ecology and Conservation* pp. n/a–n/a.
- 525 Grouzis, M., Razanaka, S., Le Floc'h, E. & Leprun, J.C. (2001) Évolution de la végétation  
526 et de quelques paramètres édaphiques au cours de la phase post-culturale dans la région  
527 d'Analabo. *Sociétés paysannes, transitions agraires et dynamiques écologiques dans le*  
528 *Sud-Ouest de Madagascar, Antananarivo, IRD/CNRE* pp. 327–337.
- 529 Hansen, M.C., Potapov, P.V., Moore, R., Hancher, M., Turubanova, S.A., Tyukavina, A.,  
530 Thau, D., Stehman, S.V., Goetz, S.J., Loveland, T.R., Kommareddy, A., Egorov, A.,  
531 Chini, L., Justice, C.O. & Townshend, J.R.G. (2013) High-Resolution Global Maps of  
532 21st-Century Forest Cover Change. *Science* **342**, 850–853.
- 533 Harper, G.J., Steininger, M.K., Tucker, C.J., Juhn, D. & Hawkins, F. (2007) Fifty years  
534 of deforestation and forest fragmentation in Madagascar. *Environmental Conservation*  
535 **34**, 325–333.
- 536 Humbert, H. (1927) La destruction d'une flore insulaire par le feu. Principaux aspects de  
537 la végétation à Madagascar. *Mémoires de l'Académie Malgache* **5**, 1–80.
- 538 Humbert, H., Cours Darne, G., Besairie, H., Blasco, F., Legris, P., Riquier, J. & Gaussen,  
539 H. (1965) *Notice de la carte de Madagascar*. Institut français de Pondichéry, Pondichéry.
- 540 Keenan, R.J., Reams, G.A., Achard, F., de Freitas, J.V., Grainger, A. & Lindquist, E.  
541 (2015) Dynamics of global forest area: Results from the FAO Global Forest Resources  
542 Assessment 2015. *Forest Ecology and Management* **352**, 9 – 20, changes in Global Forest  
543 Resources from 1990 to 2015.
- 544 Kim, D.H., Sexton, J.O., Noojipady, P., Huang, C., Anand, A., Channan, S., Feng, M. &  
545 Townshend, J.R. (2014) Global, Landsat-based forest-cover change from 1990 to 2000.  
546 *Remote Sensing of Environment* **155**, 178–193.
- 547 Klein, J. (2002) Deforestation in the Madagascar Highlands – Established 'truth' and  
548 scientific uncertainty. *GeoJournal* **56**, 191–199.
- 549 Kull, C.A. (2000) Deforestation, erosion, and fire: degradation myths in the environmental  
550 history of Madagascar. *Environment and History* **6**, 423–450.
- 551 Li, W., MacBean, N., Ciais, P., Defourny, P., Lamarche, C., Bontemps, S., Houghton, R.A.  
552 & Peng, S. (2018) Gross and net land cover changes in the main plant functional types  
553 derived from the annual esa cci land cover maps (1992–2015). *Earth System Science Data*  
554 **10**, 219–234.

- 555 Martin, P.A., Newton, A.C. & Bullock, J.M. (2013) Carbon pools recover more quickly  
556 than plant biodiversity in tropical secondary forests. *Proceedings of the Royal Society of*  
557 *London B: Biological Sciences* **280**.
- 558 MEFT, USAID & CI (2009) *Evolution de la couverture de forêts naturelles à Madagascar,*  
559 *1990-2000-2005*.
- 560 Ministère de l'Environnement (1996) IEFN: Inventaire Ecologique Forestier National. Tech.  
561 rep., Ministère de l'Environnement de Madagascar, Direction des Eaux et Forêts, DFS  
562 Deutsch Forest Service GmbH, Entreprise d'études de développement rural "Mamoka-  
563 tra", FTM.
- 564 Minten, B., Sander, K. & Stifel, D. (2013) Forest management and economic rents: Evi-  
565 dence from the charcoal trade in Madagascar. *Energy for Sustainable Development* **17**,  
566 106 – 115, special Issue on Charcoal.
- 567 Murcia, C. (1995) Edge effects in fragmented forests: implications for conservation. *Trends*  
568 *in Ecology & Evolution* **10**, 58 – 62.
- 569 Neteler, M. & Mitasova, H. (2008) *Open source GIS: a GRASS GIS approach*. Springer.
- 570 Olander, L.P., Gibbs, H.K., Steininger, M., Swenson, J.J. & Murray, B.C. (2008) Reference  
571 scenarios for deforestation and forest degradation in support of REDD: a review of data  
572 and methods. *Environmental Research Letters* **3**, 025011.
- 573 Olofsson, P., Foody, G.M., Herold, M., Stehman, S.V., Woodcock, C.E. & Wulder, M.A.  
574 (2014) Good practices for estimating area and assessing accuracy of land change. *Remote*  
575 *Sensing of Environment* **148**, 42 – 57.
- 576 Olofsson, P., Foody, G.M., Stehman, S.V. & Woodcock, C.E. (2013) Making better use  
577 of accuracy data in land change studies: Estimating accuracy and area and quantifying  
578 uncertainty using stratified estimation. *Remote Sensing of Environment* **129**, 122 – 131.
- 579 ONE, DGF, FTM, MNP & CI (2013) *Evolution de la couverture*  
580 *de forêts naturelles à Madagascar 2005-2010*. [https://www.pnae.mg/](https://www.pnae.mg/couverture-de-forets-naturelles-2005-2010)  
581 [couverture-de-forets-naturelles-2005-2010](https://www.pnae.mg/couverture-de-forets-naturelles-2005-2010).
- 582 ONE, DGF, MNP, WCS & Etc Terra (2015) *Changement de la couverture*  
583 *de forêts naturelles à Madagascar, 2005-2010-2013*. [https://www.pnae.mg/](https://www.pnae.mg/couverture-de-forets-naturelles-2005-2010-2013)  
584 [couverture-de-forets-naturelles-2005-2010-2013](https://www.pnae.mg/couverture-de-forets-naturelles-2005-2010-2013).
- 585 Pearson, R.G. & Raxworthy, C.J. (2009) The evolution of local endemism in Madagascar:  
586 watershed versus climatic gradient hypotheses evaluated by null biogeographic models.  
587 *Evolution* **63**, 959–967.
- 588 Pekel, J.F., Cottam, A., Gorelick, N. & Belward, A.S. (2016) High-resolution mapping of  
589 global surface water and its long-term changes. *Nature* **540**, 418–422.

- 590 Perrier de La Bâthie, H. (1921) *La végétation malgache*, vol. 23. Musée Colonial.
- 591 Ploch, L. & Cook, N. (2012) Madagascar's Political Crisis.
- 592 Puyravaud, J.P. (2003) Standardizing the calculation of the annual rate of deforestation.  
593 *Forest Ecology and Management* **177**, 593–596.
- 594 Rakotomala, F., Rabenandrasana, J., Andriambahiny, J., Rajaonson, R., Andriamalala, F.,  
595 Burren, C., Rakotoarijaona, J., Parany, B., Vaudry, R., Rakotoniaina, S., Ranaivosoa,  
596 R., Rahagalala, P., Randrianary, T. & Grinand, C. (2015) Estimation de la déforestation  
597 des forêts humides à Madagascar entre 2005, 2010 et 2013: combinaison multi-date  
598 d'images LANDSAT, utilisation de l'algorithme Random Forest et procédure de valida-  
599 tion. *Revue Française de Photogrammétrie et de Télédétection* pp. 11–23.
- 600 Riitters, K.H. & Wickham, J.D. (2012) Decline of forest interior conditions in the conter-  
601 minous united states. *Scientific Reports* **2**, 653.
- 602 Saatchi, S.S., Harris, N.L., Brown, S., Lefsky, M., Mitchard, E.T.A., Salas, W., Zutta,  
603 B.R., Buermann, W., Lewis, S.L., Hagen, S., Petrova, S., White, L., Silman, M. &  
604 Morel, A. (2011) Benchmark map of forest carbon stocks in tropical regions across three  
605 continents. *Proceedings of the National Academy of Sciences* **108**, 9899–9904.
- 606 Saunders, D.A., Hobbs, R.J. & Margules, C.R. (1991) Biological Consequences of Ecosys-  
607 tem Fragmentation: A Review. *Conservation Biology* **5**, 18–32.
- 608 Scales, I.R. (2011) Farming at the Forest Frontier: Land Use and Landscape Change in  
609 Western Madagascar, 1896-2005. *Environment and History* **17**, 499–524.
- 610 Smith, R.J., Muir, R.D.J., Walpole, M.J., Balmford, A. & Leader-Williams, N. (2003)  
611 Governance and the loss of biodiversity. *Nature* **426**, 67–70.
- 612 Tidd, S.T., Pinder, J. & Ferguson, G.W. (2001) Deforestation and habitat loss for the  
613 Malagasy flat-tailed tortoise from 1963 through 1993. *Chelonian Conservation and Bi-  
614 ology* **4**, 59–65.
- 615 Tropek, R., Sedláček, O., Beck, J., Keil, P., Musilová, Z., Šímová, I. & Storch, D. (2014)  
616 Comment on "High-resolution global maps of 21st-century forest cover change". *Science*  
617 **344**, 981–981.
- 618 Tyukavina, A., Baccini, A., Hansen, M.C., Potapov, P.V., Stehman, S.V., Houghton, R.A.,  
619 Krylov, A.M., Turubanova, S. & Goetz, S.J. (2015) Aboveground carbon loss in natural  
620 and managed tropical forests from 2000 to 2012. *Environmental Research Letters* **10**,  
621 074002.
- 622 Tyukavina, A., Hansen, M.C., Potapov, P.V., Stehman, S.V., Smith-Rodriguez, K., Okpa,  
623 C. & Aguilar, R. (2017) Types and rates of forest disturbance in Brazilian Legal Amazon,  
624 2000–2013. *Science Advances* **3**.

- 625 United Nations (2015) *World Population Prospects: The 2015 Revision, Key Findings and*  
626 *Advance Tables. Working Paper No. ESA/P/WP.241.*
- 627 Verhegghen, A., Eva, H., Desclée, B. & Achard, F. (2016) Review and Combination of Re-  
628 cent Remote Sensing Based Products for Forest Cover Change Assessments in Cameroon.  
629 *International Forestry Review* **18**, 14–25.
- 630 Vieilledent, G., Gardi, O., Grinand, C., Burren, C., Andriamanjato, M., Camara, C., Gard-  
631 ner, C.J., Glass, L., Rasolohery, A., Rakoto Ratsimba, H., Gond, V. & Rakotoarijaona,  
632 J.R. (2016) Bioclimatic envelope models predict a decrease in tropical forest carbon  
633 stocks with climate change in Madagascar. *Journal of Ecology* **104**, 703–715.
- 634 Vieilledent, G., Grinand, C. & Vaudry, R. (2013) Forecasting deforestation and carbon  
635 emissions in tropical developing countries facing demographic expansion: a case study  
636 in Madagascar. *Ecology and Evolution* **3**, 1702–1716.
- 637 Virah-Sawmy, M. (2009) Ecosystem management in Madagascar during global change.  
638 *Conservation Letters* **2**, 163–170.
- 639 Vogt, P. & Riitters, K. (2017) GuidosToolbox: universal digital image object analysis.  
640 *European Journal of Remote Sensing* **50**, 352–361.
- 641 Vorontsova, M.S., Besnard, G., Forest, F., Malakasi, P., Moat, J., Clayton, W.D., Ficinski,  
642 P., Savva, G.M., Nanjarisoa, O.P., Razanatsoa, J., Randriatsara, F.O., Kimeu, J.M.,  
643 Luke, W.R.Q., Kayombo, C. & Linder, H.P. (2016) Madagascar’s grasses and grasslands:  
644 anthropogenic or natural? *Proceedings of the Royal Society of London B: Biological*  
645 *Sciences* **283**.

## 646 9 Tables

Table 1: **Change in natural forest cover and deforestation rates from 1953 to 2014 in Madagascar.** Areas are provided in thousands of hectares (Kha). Forest map for the year 1973 has 3.3 Mha of unclassified areas due to the presence of clouds on satellite images. As a consequence, partial deforestation rates for the periods 1953-1973 and 1973-1990 are computed based on the available forest extent. The last two columns indicate the annual deforested areas and annual deforestation rates on the previous time-period (e.g. 1953-1973 for year 1973, 1973-1990 for year 1990, etc.).

| Year | Forest (Kha) | Unmap (Kha) | Annual defor. (Kha/yr) | Rate (%/yr) |
|------|--------------|-------------|------------------------|-------------|
| 1953 | 15,968       | 0           | -                      | -           |
| 1973 | 14,243       | 3,317       | 86                     | 0.6         |
| 1990 | 10,762       | 0           | 205                    | 1.6         |
| 2000 | 9,879        | 0           | 88                     | 0.8         |
| 2005 | 9,668        | 0           | 42                     | 0.4         |
| 2010 | 9,320        | 0           | 70                     | 0.7         |
| 2014 | 8,925        | 0           | 99                     | 1.1         |

**Table 2: Comparing Madagascar forest cover estimates with previous studies on the period 1953-2014.** We compared our estimates of forest cover with the estimates from three previous studies (Harper *et al.*, 2007; MEFT *et al.*, 2009; ONE *et al.*, 2015). Areas are provided in thousands of hectares (Kha). We obtained a Pearson’s correlation coefficient of 0.99 between our forest cover estimates and forest cover estimates from previous studies. The increase in mangrove and spiny forest covers from 1953 to 1973 in Harper *et al.* (2007) and our study is most probably due to differences in forest definition and mapping methods between the 1953 aerial-photography derived map and the 1973 Landsat image derived map.

| Forest type | Source     | 1953   | 1973   | 1990   | 2000  | 2005  | 2010  | 2013  | 2014  |
|-------------|------------|--------|--------|--------|-------|-------|-------|-------|-------|
| Total       | Harper2007 | 15,996 | 14,173 | 10,606 | 8,982 | -     | -     | -     | -     |
|             | MEFT2009   | -      | -      | 10,650 | 9,678 | 9,413 | -     | -     | -     |
|             | ONE2015    | -      | -      | -      | -     | 9,451 | 8,977 | 8,486 | -     |
|             | this study | 15,968 | 14,243 | 10,762 | 9,879 | 9,668 | 9,320 | 9,051 | 8,925 |
| Moist       | Harper2007 | 8,766  | 6,876  | 5,234  | 4,167 | -     | -     | -     | -     |
|             | MEFT2009   | -      | -      | 5,271  | 4,788 | 4,700 | -     | -     | -     |
|             | ONE2015    | -      | -      | -      | -     | 4,556 | 4,457 | 4,345 | -     |
|             | this study | 8,578  | 6,990  | 5,270  | 4,872 | 4,768 | 4,633 | 4,470 | 4,410 |
| Dry         | Harper2007 | 4,252  | 4,028  | 2,712  | 2,457 | -     | -     | -     | -     |
|             | MEFT2009   | -      | -      | 3,321  | 3,085 | 3,028 | -     | -     | -     |
|             | ONE2015    | -      | -      | -      | -     | 3,223 | 2,970 | 2,679 | -     |
|             | this study | 4,762  | 4,435  | 3,225  | 2,941 | 2,881 | 2,735 | 2,642 | 2,596 |
| Spiny       | Harper2007 | 2,978  | 3,030  | 2,420  | 2,132 | -     | -     | -     | -     |
|             | MEFT2009   | -      | -      | 2,124  | 1,872 | 1,757 | -     | -     | -     |
|             | ONE2015    | -      | -      | -      | -     | 1,682 | 1,559 | 1,467 | -     |
|             | this study | 2,463  | 2,583  | 2,055  | 1,858 | 1,811 | 1,744 | 1,731 | 1,713 |
| Mangroves   | Harper2007 | -      | -      | 240    | 226   | -     | -     | -     | -     |
|             | MEFT2009   | -      | -      | -      | -     | -     | -     | -     | -     |
|             | ONE2015    | -      | -      | -      | -     | 174   | 171   | 170   | -     |
|             | this study | 143    | 200    | 181    | 178   | 177   | 177   | 177   | 177   |

**Table 3: Comparing Madagascar annual deforestation rates with previous studies on the period 1953-2013.** Annual deforested areas (in thousands of hectares per year, Kha/yr) and annual deforestation rates (second number in parenthesis, in %/yr) are provided. For deforestation rates in %/yr, exact same numbers as in scientific articles and reports from previous studies (Harper *et al.*, 2007; MEFT *et al.*, 2009; ONE *et al.*, 2015) have been reported. The way annual deforestation rates in %/yr have been computed in these previous studies can slightly differ from one study to another, but estimates always correct for the potential presences of clouds on satellite images and unclassified areas on forest maps. Annual deforested areas in Kha/yr have been recomputed from forest cover estimates in Tab. 2 (except for Harper *et al.* (2007) for the periods 1973-1990 and 1990-2000 for which annual deforested areas in Kha/yr were derived from numbers reported in the original publication, see methods) and do not correct for the potential presence of clouds.

| Forest type | Source     | 1953-1973 | 1973-1990 | 1990-2000 | 2000-2005 | 2005-2010 | 2010-2013 |
|-------------|------------|-----------|-----------|-----------|-----------|-----------|-----------|
| Total       | Harper2007 | 91 (0.3)  | 200 (1.7) | 81 (0.9)  | -         | -         | -         |
|             | MEFT2009   | -         | -         | 97 (0.8)  | 53 (0.5)  | -         | -         |
|             | ONE2015    | -         | -         | -         | -         | 95 (1.2)  | 164 (1.5) |
|             | this study | 86 (0.6)  | 205 (1.6) | 88 (0.9)  | 42 (0.4)  | 70 (0.7)  | 90 (1.0)  |
| Moist       | Harper2007 | 94 (0.6)  | 87 (1.7)  | 32 (0.8)  | -         | -         | -         |
|             | MEFT2009   | -         | -         | 48 (0.8)  | 17 (0.4)  | -         | -         |
|             | ONE2015    | -         | -         | -         | -         | 20 (0.5)  | 37 (0.9)  |
|             | this study | 79 (1.0)  | 101 (1.6) | 40 (0.8)  | 21 (0.4)  | 27 (0.6)  | 54 (1.2)  |
| Dry         | Harper2007 | 11 (0.2)  | 77 (1.9)  | 20 (0.7)  | -         | -         | -         |
|             | MEFT2009   | -         | -         | 24 (0.7)  | 11 (0.4)  | -         | -         |
|             | ONE2015    | -         | -         | -         | -         | 51 (1.8)  | 97 (2.3)  |
|             | this study | 16 (0.4)  | 71 (1.9)  | 28 (0.9)  | 12 (0.4)  | 29 (1.0)  | 31 (1.1)  |
| Spiny       | Harper2007 | -3 (-0.1) | 36 (1.2)  | 28 (1.2)  | -         | -         | -         |
|             | MEFT2009   | -         | -         | 25 (1.2)  | 23 (1.2)  | -         | -         |
|             | ONE2015    | -         | -         | -         | -         | 25 (1.7)  | 31 (1.7)  |
|             | this study | -6 (-0.2) | 31 (1.3)  | 20 (1.0)  | 9 (0.5)   | 13 (0.7)  | 4 (0.3)   |
| Mangroves   | Harper2007 | -         | -         | 1 (0.2)   | -         | -         | -         |
|             | MEFT2009   | -         | -         | -         | -         | -         | -         |
|             | ONE2015    | -         | -         | -         | -         | 0 (0.3)   | 0 (0.2)   |
|             | this study | -3 (-1.7) | 1 (0.6)   | 0 (0.2)   | 0 (0.0)   | 0 (0.0)   | 0 (0.0)   |

Table 4: **Change in forest fragmentation from 1953 to 2014 in Madagascar.** Five forest fragmentation classes, based on the percentage of forest in the neighborhood, are defined: 0-20% (highly fragmented), 21-40%, 41-60%, 61-80% and 81-100% (lowly fragmented). The percentage of forest falling in each forest fragmentation class is reported for each year. Forest areas are provided in thousands of hectares (Kha).

| Year | Forest (Kha) | 0-20 | 21-40 | 41-60 | 61-80 | 81-100 |
|------|--------------|------|-------|-------|-------|--------|
| 1953 | 15,968       | 0    | 1     | 8     | 12    | 78     |
| 1973 | 14,243       | 6    | 9     | 12    | 16    | 57     |
| 1990 | 10,762       | 7    | 10    | 13    | 17    | 53     |
| 2000 | 9,879        | 7    | 11    | 14    | 17    | 51     |
| 2005 | 9,673        | 8    | 11    | 14    | 18    | 49     |
| 2010 | 9,320        | 8    | 12    | 15    | 18    | 47     |
| 2014 | 8,925        | 9    | 13    | 16    | 19    | 44     |



647 **10 Figures**

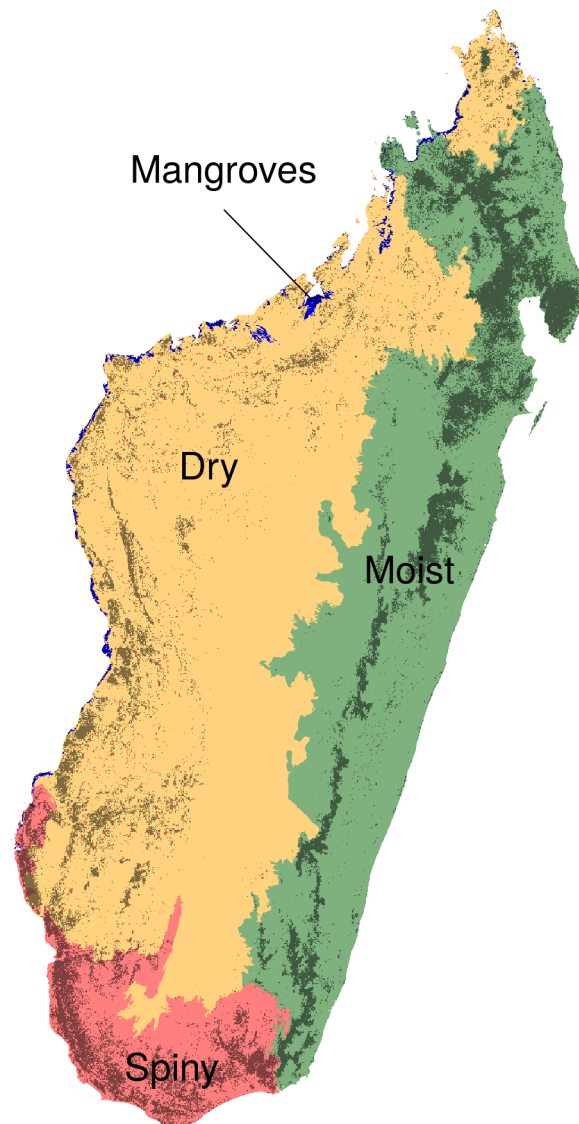

Figure 1: **Ecoregions and forest types in Madagascar.** Madagascar can be divided into four climatic ecoregions with four forest types: the moist forest in the East (green), the dry forest in the West (orange), the spiny forest in the South (red), and the mangroves on the West coast (blue). Ecoregions were defined following climatic (Cornet, 1974) and vegetation (Ministère de l'Environnement, 1996) criteria. The dark grey areas represent the remaining natural forest cover for the year 2014. Forest types are defined on the basis of their belonging to one of the four ecoregions.

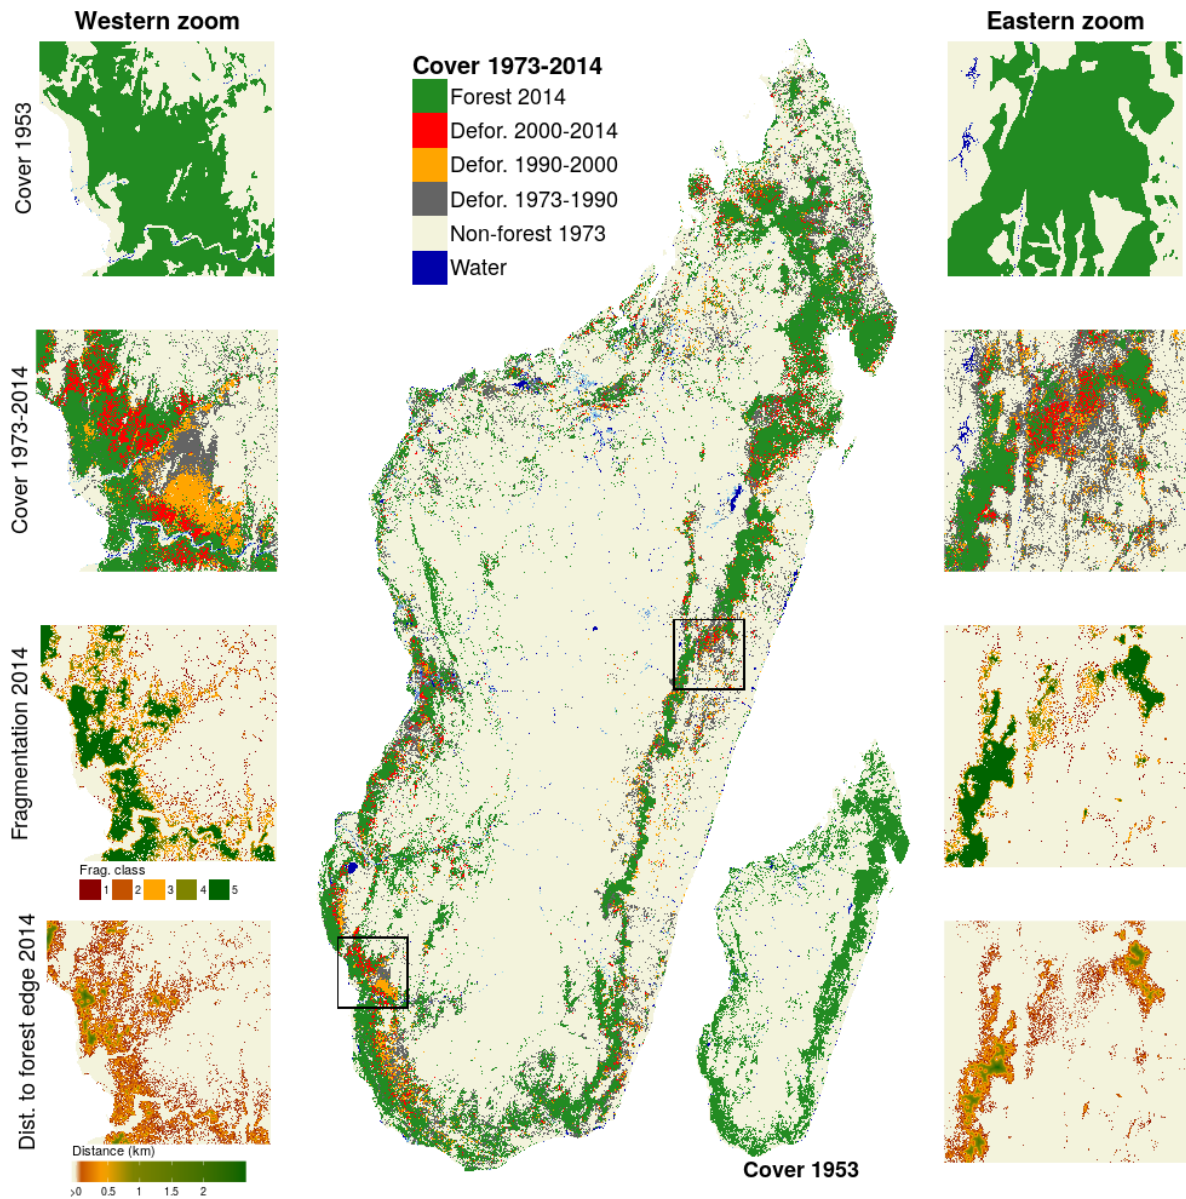

Figure 2: **Forest cover change on six decades from 1953 to 2014 in Madagascar.** forest cover changes from 1973 to 2014 are shown in the main figure, and forest cover in 1953 is shown in the bottom-right inset. Two zooms in the western dry (left part) and eastern moist (right part) ecoregions present more detailed views of (from top to bottom): forest cover in 1953, forest cover change from 1973 to 2014, forest fragmentation in 2014 and distance to forest edge in 2014. Data on water bodies (blue) and water seasonality (light blue for seasonal water to dark blue for permanent water) has been extracted from Pekel *et al.* (2016).

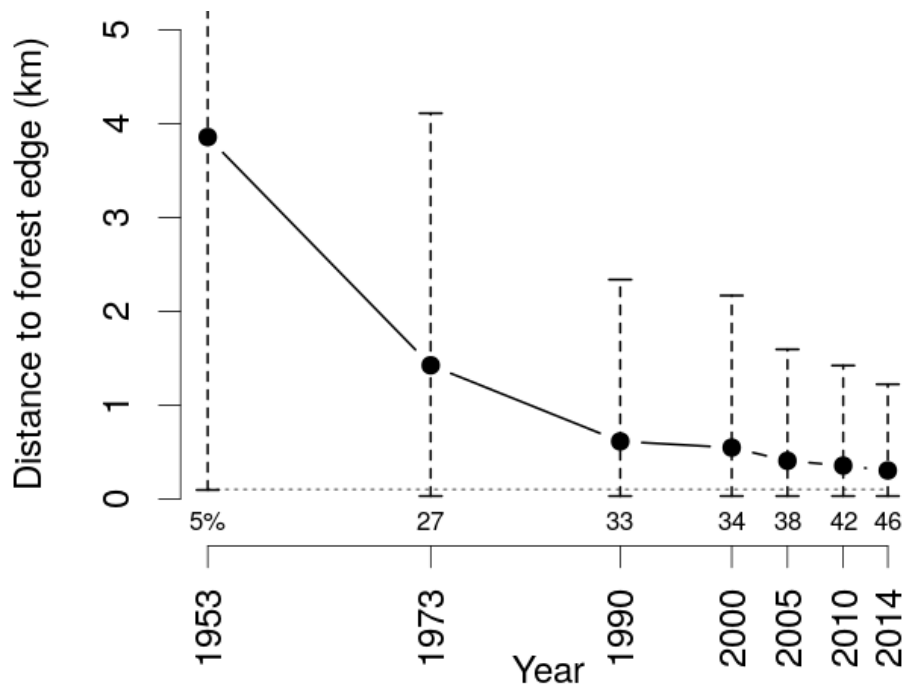

Figure 3: **Change in distance to forest edge from 1953 to 2014 in Madagascar.** Black dots represent the mean distance to forest edge for each year. Vertical dashed segments represent the 90% quantiles (5% and 95%) of the distance to forest edge. Horizontal dashed grey line indicates a distance to forest edge of 100 m. Numbers at the bottom of each vertical segments are the percentage of forest at a distance to forest edge lower than 100 m for each year.

## 648 11 Supplementary material

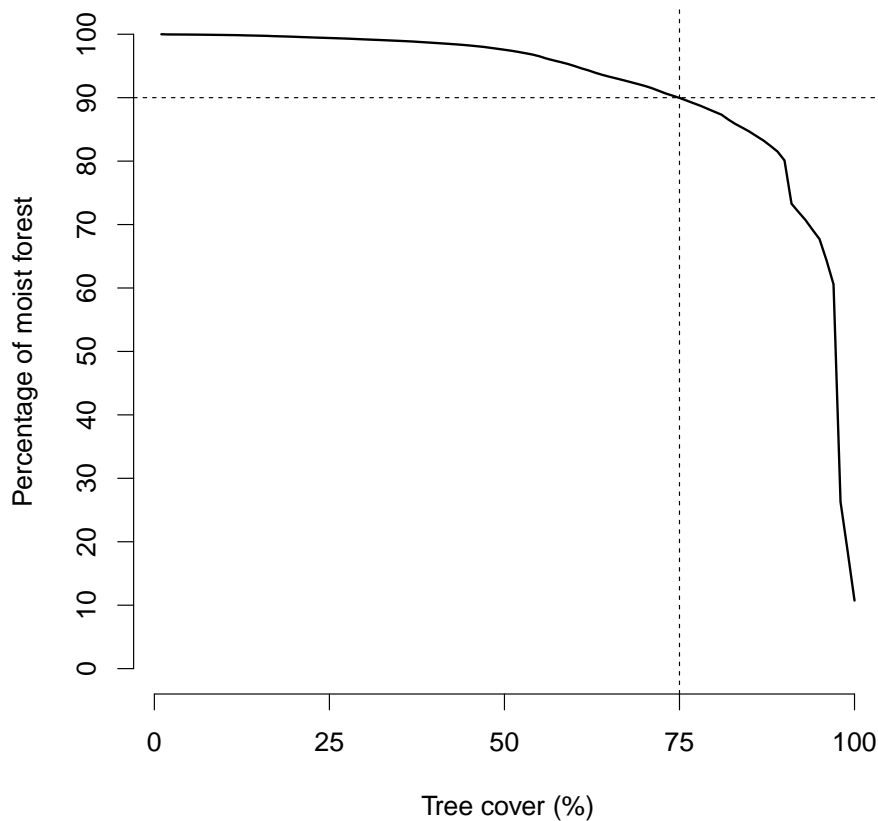

Figure A1: **Selection of the tree cover threshold to define the land type for unclassified areas in 2000.** We considered the forest in 2000 (Harper *et al.*, 2007) in the moist ecoregion (see Fig. 1). We plotted the percentage of forest having a tree cover greater or equal to a given value specified by the x-axis. From this figure, we see that 90% of the moist forest in 2000 has a tree cover  $\geq 75$ .
